# Supplementary figures and images for: Antinociceptive Effects of Aaptamine, a Sponge Component, on Peripheral Neuropathy in Rats
Source: MDPI journal article supplement (doi:10.3390/md21020113), 2023-02-04

Fig. 8C

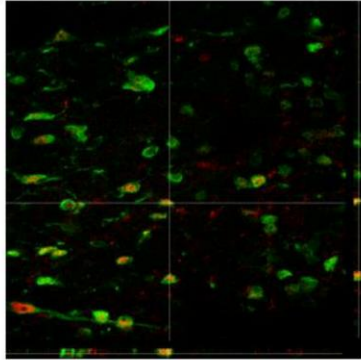

Fig. 8D

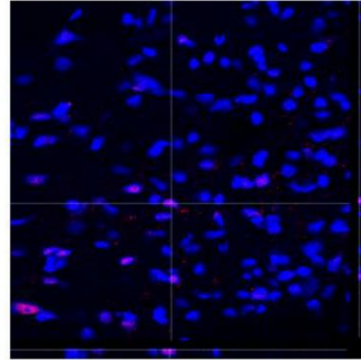

**Figure S1.** The uncropped images of Figure 8C,D.

Supplement: s1 [file s1]
